# Supplementary material for: Generation of novel patient-derived CIC-DUX4 sarcoma xenografts and cell lines
Source: PubMed Central journal article supplement (PMC5498486; doi:10.1038/s41598-017-04967-0), 2017-07-05
Supplement: 41598_2017_4967_MOESM1_ESM.pdf [file 41598_2017_4967_MOESM1_ESM.pdf]

## Supplementary Information

### Generation of novel patient-derived *CIC-DUX4* sarcoma xenografts and cell lines

Rieko Oyama<sup>1</sup>, Mami Takahashi<sup>2</sup>, Akihiko Yoshida<sup>3</sup>, Marimu Sakumoto<sup>1</sup>, Yoko Takai<sup>1</sup>, Fusako Kito<sup>1</sup>, Kumiko Shiozawa<sup>4</sup>, Zhiwei Qiao<sup>4</sup>, Yasuhito Arai<sup>5</sup>, Tatsuhiro Shibata<sup>5</sup>, Yoshihiro Araki<sup>6</sup>, Makoto Endo<sup>6</sup>, Akira Kawai<sup>6</sup>, and Tadashi Kondo<sup>1,4\*</sup>

<sup>1</sup>Department of Innovative Seeds Evaluation, National Cancer Center Research Institute, 5-1-1 Tsukiji, Chuo-ku, Tokyo 104-0045, Japan

<sup>2</sup>Central Animal Division, National Cancer Center Research Institute, 5-1-1 Tsukiji, Chuo-ku, Tokyo 104-0045, Japan–

<sup>3</sup>Pathology and Clinical Laboratory Division, National Cancer Center Hospital, 5-1-1 Tsukiji, Chuo-ku, Tokyo 104-0045, Japan

<sup>4</sup>Division of Rare Cancer Research, National Cancer Center Research Institute, 5-1-1 Tsukiji, Chuo-ku, Tokyo 104-0045, Japan

<sup>5</sup>Division of Cancer Genomics, National Cancer Center Research Institute, 5-1-1 Tsukiji, Chuo-ku, Tokyo 104-0045, Japan

<sup>6</sup>Division of Musculoskeletal Oncology, National Cancer Center Hospital, 5-1-1 Tsukiji, Chuo-ku, Tokyo 104-0045, Japan

**Table S1.** STR analysis

| Microsatellite<br>(Chromosome) | NCC-CDS1-X1-<br>C1 (P14) | NCC-CDS1-X2-<br>C1 (P35) | NCC-CDS1-<br>X1 (PDX) | NCC-CDS1-<br>X2 (PDX) | Tumor Tissue |
|--------------------------------|--------------------------|--------------------------|-----------------------|-----------------------|--------------|
| Amelogenin (X Y)               | X,X                      | X,X                      | X,X                   | X,X                   | X,X          |
| TH01 (3)                       | 7,9                      | 7,9                      | 7,9                   | 7,9                   | 7,9          |
| D21S11 (21)                    | 30,30                    | 30,30                    | 30,30                 | 30,30                 | 30,30        |
| D5S818 (5)                     | 10,12                    | 10,12                    | 10,12                 | 10,12                 | 10,12        |
| D13S317 (13)                   | 11,12                    | 11,12                    | 11,12                 | 11,12                 | 11,12        |
| D7S820 (7)                     | 12,13                    | 12,13                    | 12,13                 | 12,13                 | 12,13        |
| D16S539 (16)                   | 9,13                     | 9,13                     | 9,13                  | 9,13                  | 9,13         |
| CSF1PO (5)                     | 11,13                    | 11,13                    | 11,13                 | 11,13                 | 11,13        |
| vWA (12)                       | 14,16                    | 14,16                    | 14,16                 | 14,16                 | 14,16        |
| TPOX (2)                       | 8,8                      | 8,8                      | 5,8                   | 8,8                   | 8,8          |

Cells were compared to a normal and tumor tissue from the patient.

P indicates a passage number of a cell line.

**Table S2. KEGG pathways enriched in the proteome of different samples.**

| KEGG Enrichment Rank | Pathway                                     | Primary tumour | NCC-CDS1-X1 | NCC-CDS1-X3 | X1-C1 | X3-C1 | Observations                                                    |
|----------------------|---------------------------------------------|----------------|-------------|-------------|-------|-------|-----------------------------------------------------------------|
| 1                    | Proteasome                                  | 1              | 2           | 2           | 3     | 3     | Consistently enriched in all samples                            |
| 2                    | Spliceosome                                 | 2              | 3           | 3           | 2     | 2     |                                                                 |
| 3                    | Ribosome                                    | 3              | 1           | 1           | 1     | 1     |                                                                 |
| 4                    | Pathogenic Escherichia coli infection       | 4              | 4           | 5           | 5     | 7     |                                                                 |
| 5                    | Glycolysis / Gluconeogenesis                | 5              | 6           | 4           | 8     | 8     |                                                                 |
| 8                    | Pyruvate metabolism                         | 8              | 8           | 9           | 9     | 9     |                                                                 |
| 9                    | Huntington's disease                        | 9              | 15          | 13          | 6     | 6     |                                                                 |
| 12                   | Pentose phosphate pathway                   | 12             | 7           | 6           | 15    | 21    |                                                                 |
| 14                   | Citrate cycle (TCA cycle)                   | 14             | 5           | 7           | 4     | 4     |                                                                 |
| 19                   | Glyoxylate and dicarboxylate metabolism     | 19             | 9           | 11          | 22    | 12    |                                                                 |
| 17                   | Aminoacyl-tRNA biosynthesis                 | 17             |             | 16          | 7     | 5     |                                                                 |
| 18                   | Parkinson's disease                         | 18             |             | 15          | 10    | 10    |                                                                 |
| 24                   | Alzheimer's disease                         | 24             |             | 20          | 11    | 13    |                                                                 |
| 6                    | Focal adhesion                              | 6              | 10          | 21          |       |       | Enriched in all but xenograft tissues and cell lines            |
| 25                   | Regulation of actin cytoskeleton            | 25             | 12          |             |       |       |                                                                 |
| 23                   | Tight junction                              | 23             |             | 14          |       |       |                                                                 |
| 15                   | Fatty acid elongation in mitochondria       | 15             |             |             | 16    | 16    | Enriched in xenograft tissues and cell lines                    |
| 16                   | Fatty acid metabolism                       | 16             |             |             | 20    | 11    |                                                                 |
| 20                   | Methane metabolism                          | 20             |             |             |       | 20    |                                                                 |
| 29                   | Propanoate metabolism                       |                | 11          |             | 17    |       | Irregularly enriched in primary tumours and cell lines          |
| 35                   | DNA replication                             |                |             | 17          | 18    |       |                                                                 |
| 33                   | Cysteine and methionine metabolism          |                |             | 8           |       | 19    |                                                                 |
| 7                    | Complement and coagulation cascades         | 7              |             |             |       |       | Enriched only in primary tumor tissue                           |
| 10                   | Systemic lupus erythematosus                | 10             |             |             |       |       |                                                                 |
| 11                   | Prion diseases                              | 11             |             |             |       |       |                                                                 |
| 13                   | Antigen processing and presentation         | 13             |             |             |       |       |                                                                 |
| 21                   | Valine, leucine and isoleucine degradation  | 21             |             |             |       |       |                                                                 |
| 22                   | Viral myocarditis                           | 22             |             |             |       |       |                                                                 |
| 27                   | Gap junction                                |                | 14          | 12          |       |       | Enriched only in xenograft tissues                              |
| 30                   | Fructose and mannose metabolism             |                | 13          | 10          |       |       |                                                                 |
| 31                   | Cell cycle                                  |                | 16          | 18          |       |       |                                                                 |
| 32                   | Leukocyte transendothelial migration        |                | 17          | 25          |       |       |                                                                 |
| 36                   | One carbon pool by folate                   |                |             | 19          |       |       |                                                                 |
| 45                   | Lysine degradation                          |                |             |             | 13    | 14    | Enriched only in cell lines, either consistently or irregularly |
| 46                   | Valine, leucine and isoleucine biosynthesis |                |             |             | 14    | 24    |                                                                 |
| 48                   | Arginine and proline metabolism             |                |             |             | 21    | 22    |                                                                 |
| 28                   | Fructose and mannose metabolism             |                |             |             | 19    |       |                                                                 |
| 41                   | Oocyte meiosis                              |                |             |             | 23    |       |                                                                 |
| 44                   | Oxidative phosphorylation                   |                |             |             | 12    |       |                                                                 |
| 47                   | Butanoate metabolism                        |                |             |             | 18    |       |                                                                 |
| 38                   | Cardiac muscle contraction                  |                |             |             |       | 23    |                                                                 |
| 39                   | Protein export                              |                |             |             |       | 17    |                                                                 |
| 51                   | Oxidative phosphorylation                   |                |             |             |       | 15    |                                                                 |
| 52                   | Selenoamino acid metabolism                 |                |             |             |       | 25    |                                                                 |

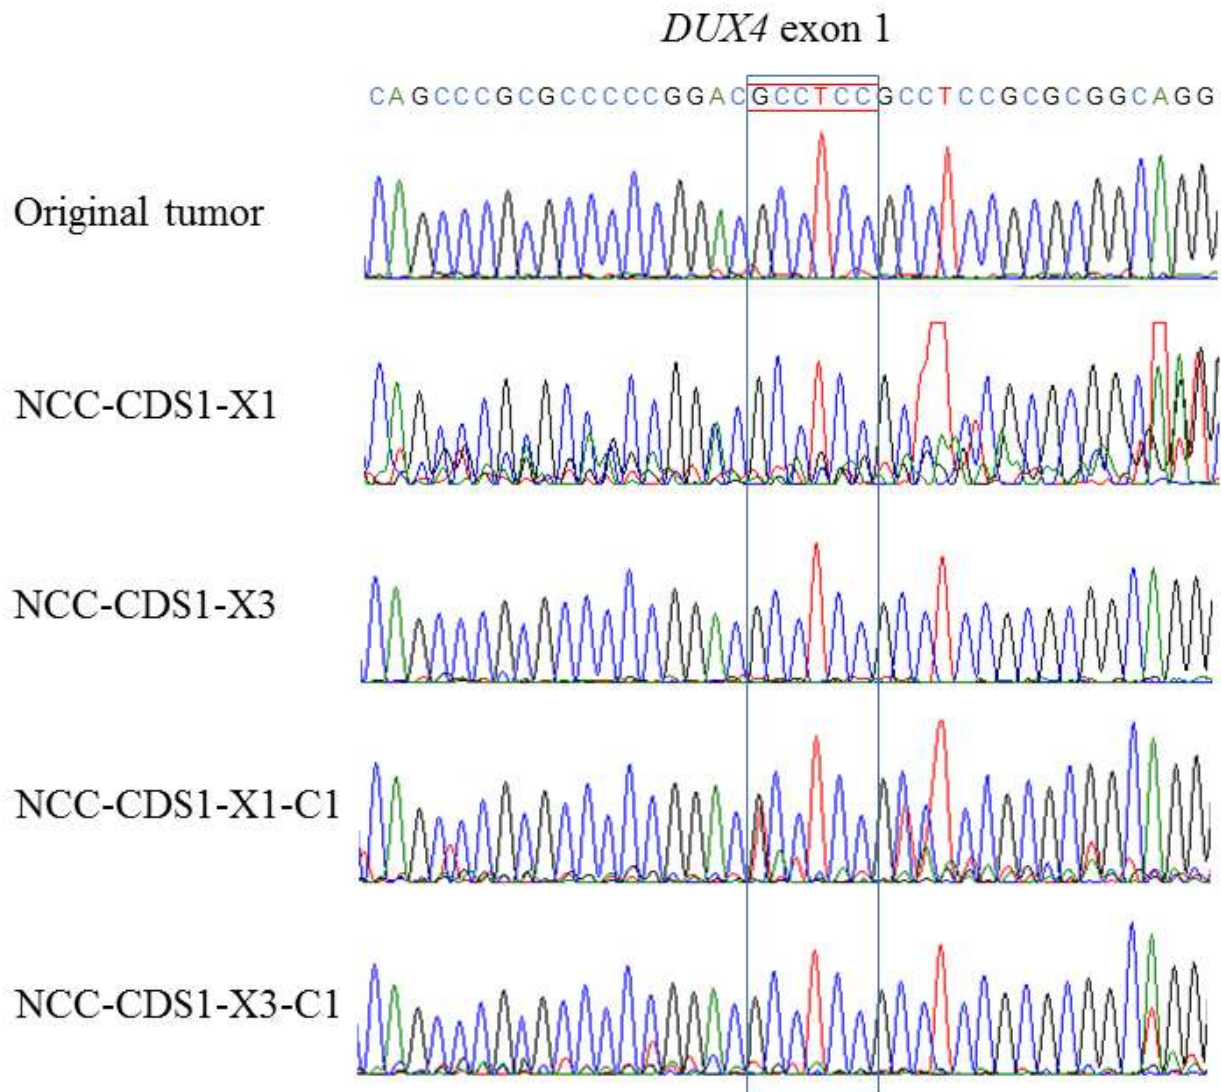

**Figure S1.** Sanger sequencing showed that the nucleotide sequence 5'-CGCCTC-3' was detected within *DUX4* exon 1, but not *DUX4L*, indicating that *CIC* was fused to *DUX4* (4q35). The sample names are shown on the left side of the panels.

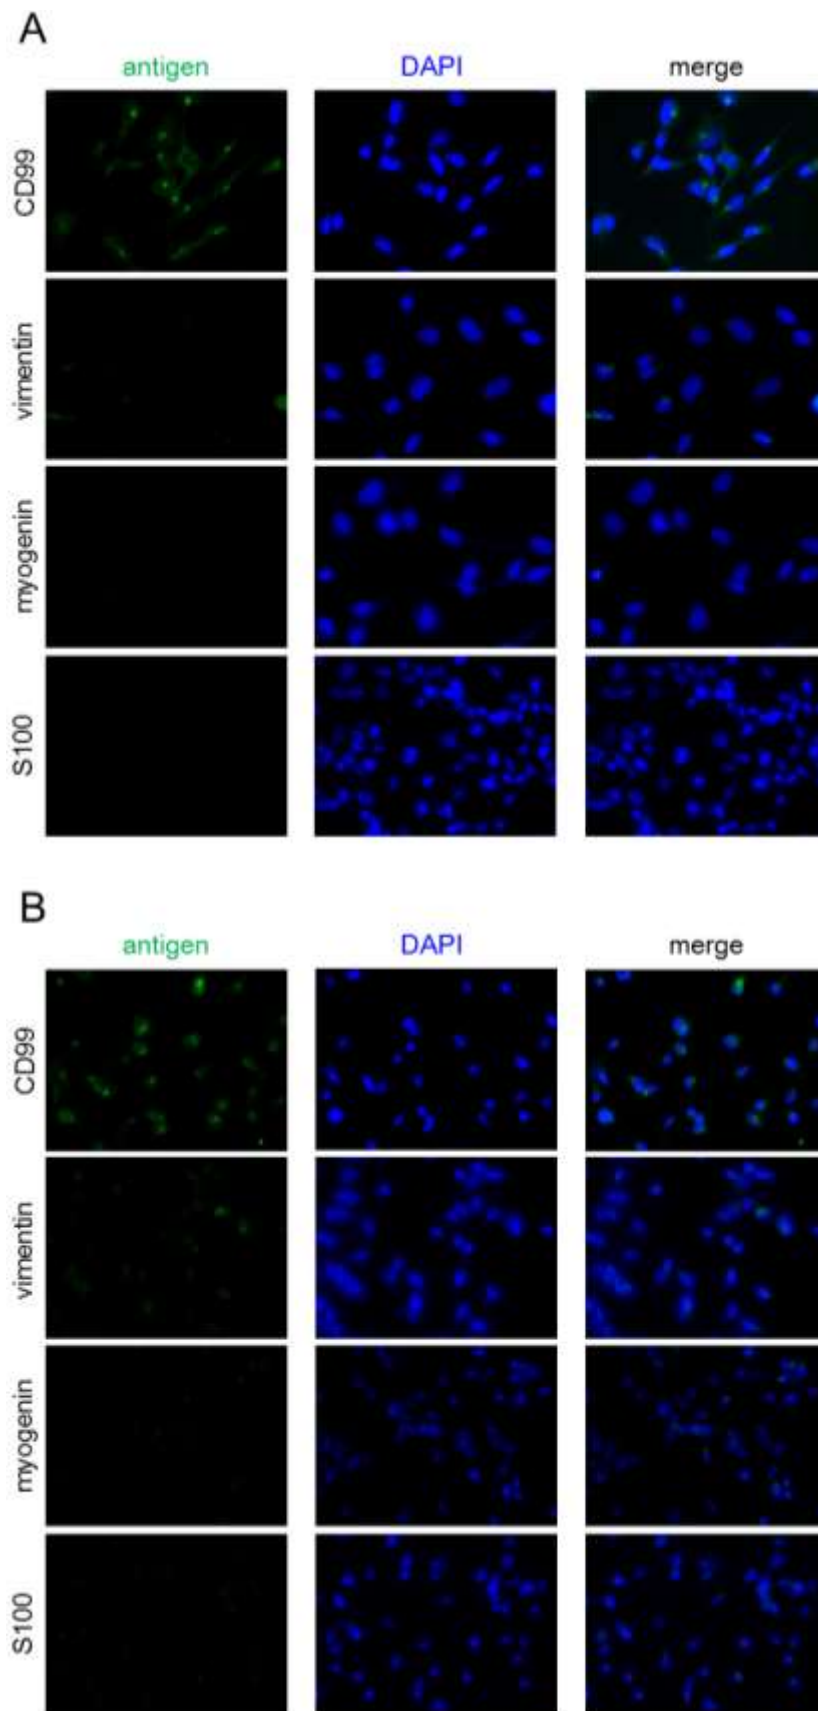

**Figure S2.** Immunofluorescence study for CD99, vimentin, myogenin, and S100. (A) NCC-CDS1-X1-C1, (B) NCC-CDS1-X3-C1.

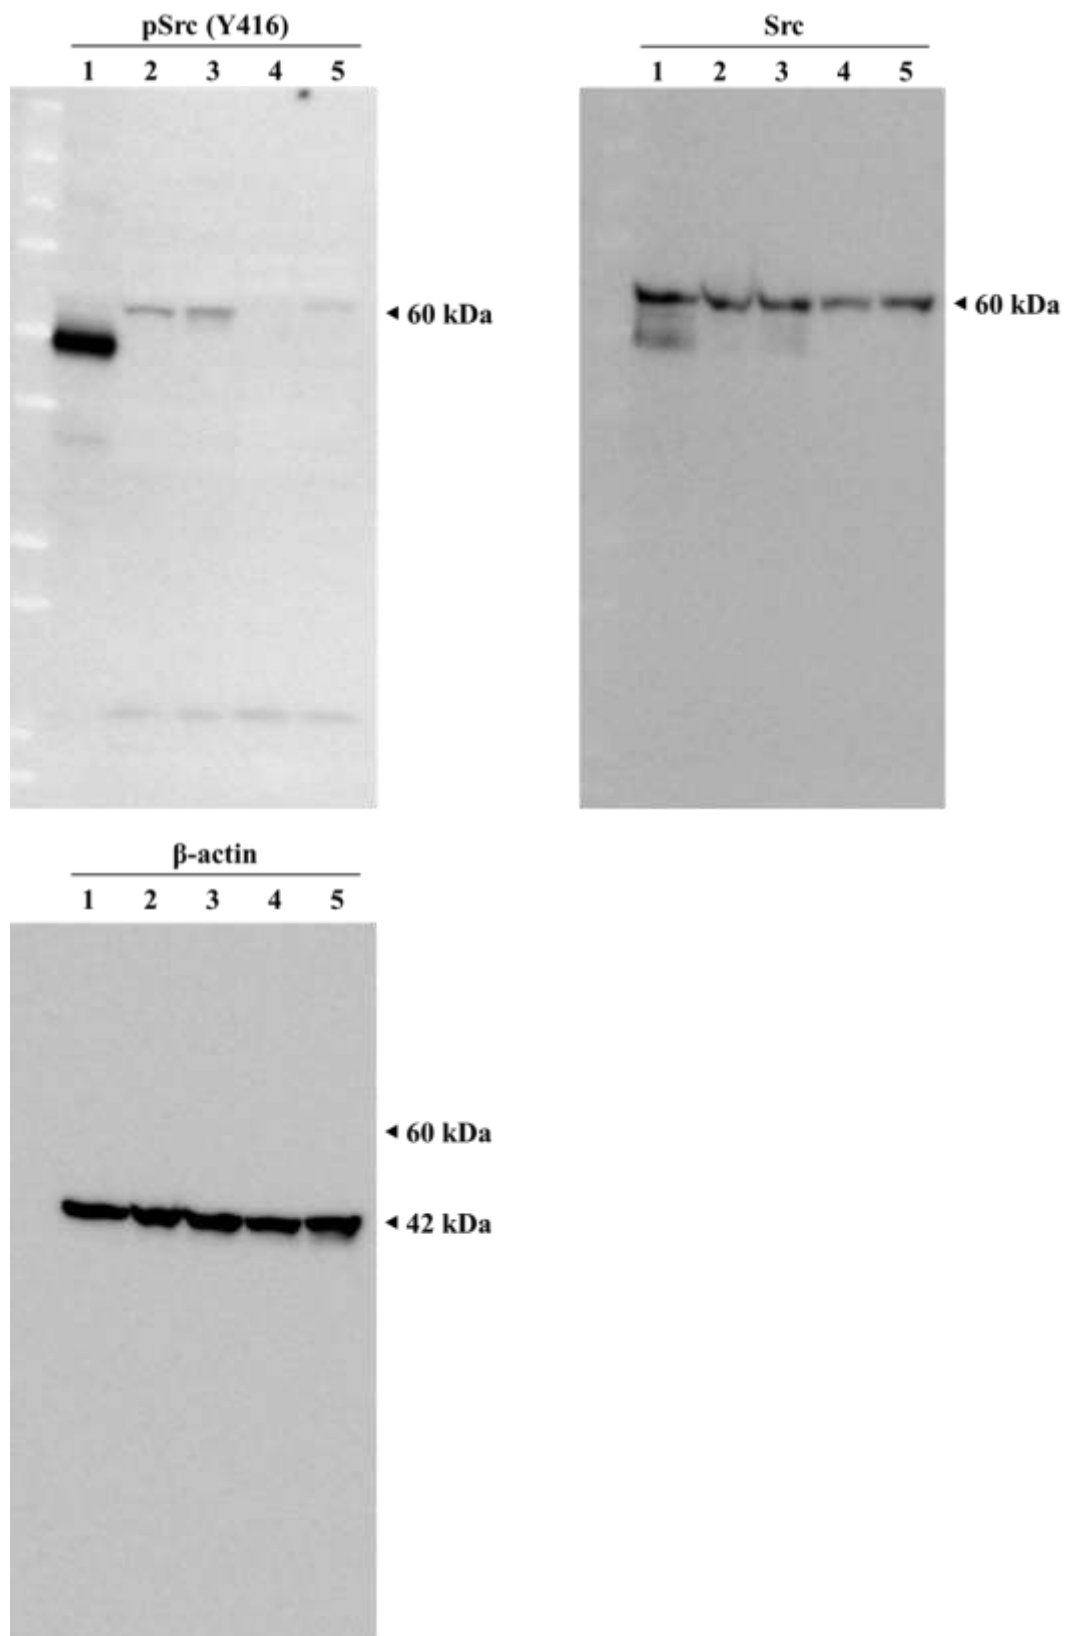

**Figure S3.** Phosphorylated Src expressions were analysed by Western blotting. Arrowheads indicate the position of Src with a molecular weight of 60 kDa. Lanes 1: tumour tissue, 2: NCC-CDS1-X1 tumour tissue, 3: NCC-CDS1-X3 tumour tissue, 4: NCC-CDS1-X1-C1 cells, 5: NCC-CDS1-X3-C1 cells.
